# Supplementary material for: A new green approach for the reduction of consumed solvents and simultaneous quality control analysis of several pharmaceuticals using a fast and economic RP-HPLC method; a case study for a mixture of piracetam, ketoprofen and omeprazole drugs
Source: Royal Society of Chemistry journal article supplement (doi:10.1039/d2ra02395d), 2022-01-01
Supplement: d2ra02395d1.pdf [file d2ra02395d1.pdf]

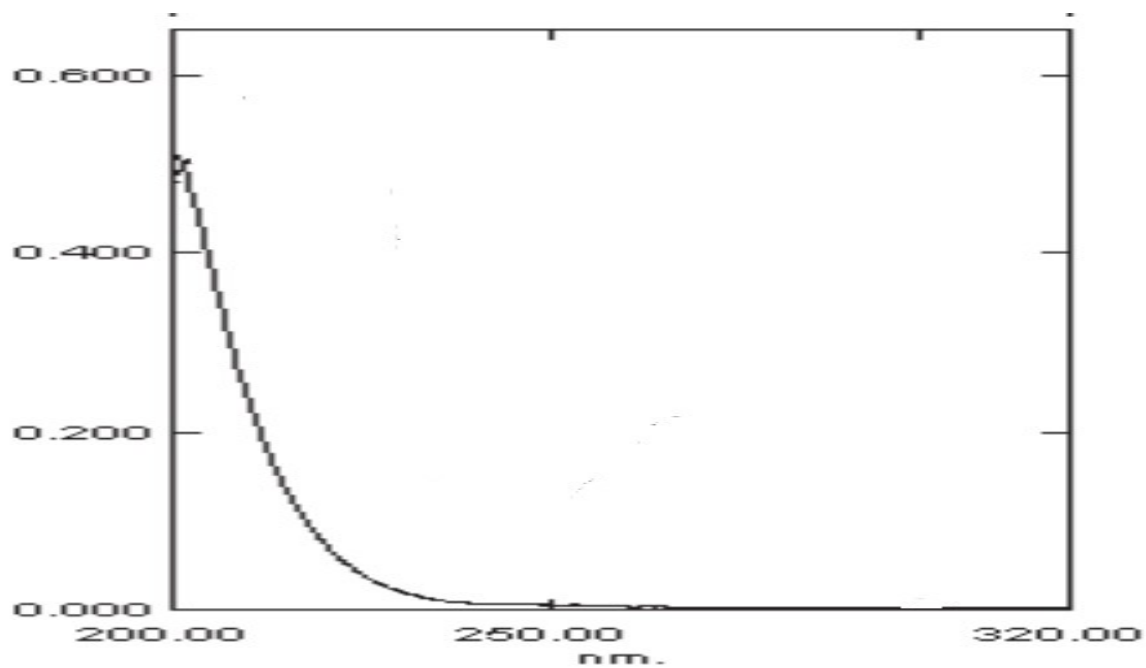

Fig S1A: UV spectrum of Piracetam in 0.1M HCl.

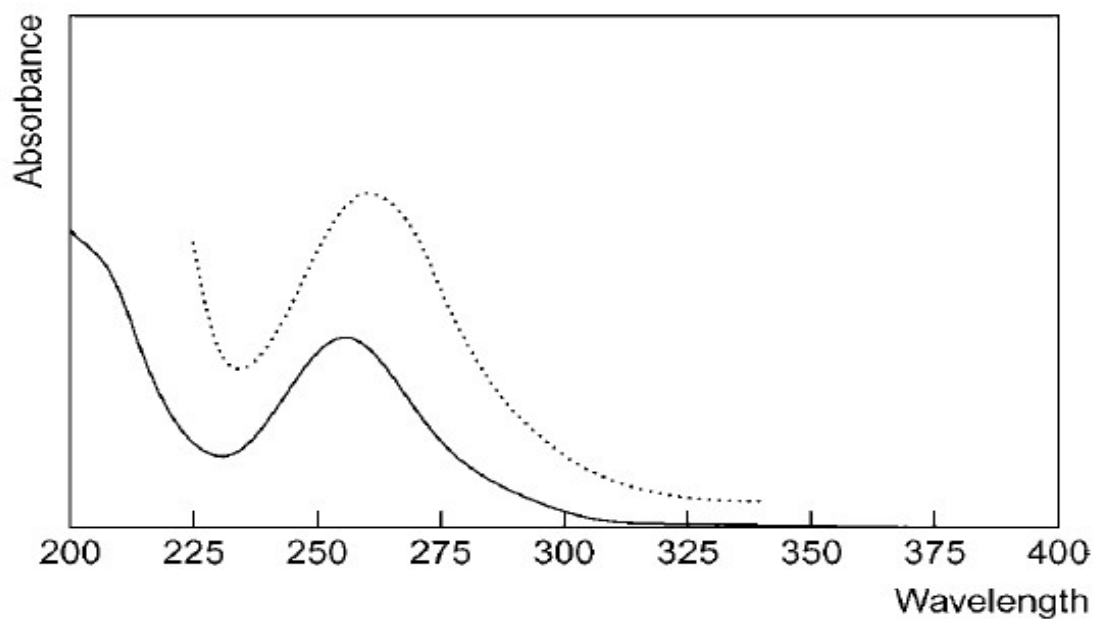

Fig S1B: UV spectrum of ketoprofen aqueous acid and alkali at  $\lambda_{\text{max}} = 260 \text{ nm}$  and  $262 \text{ nm}$ .

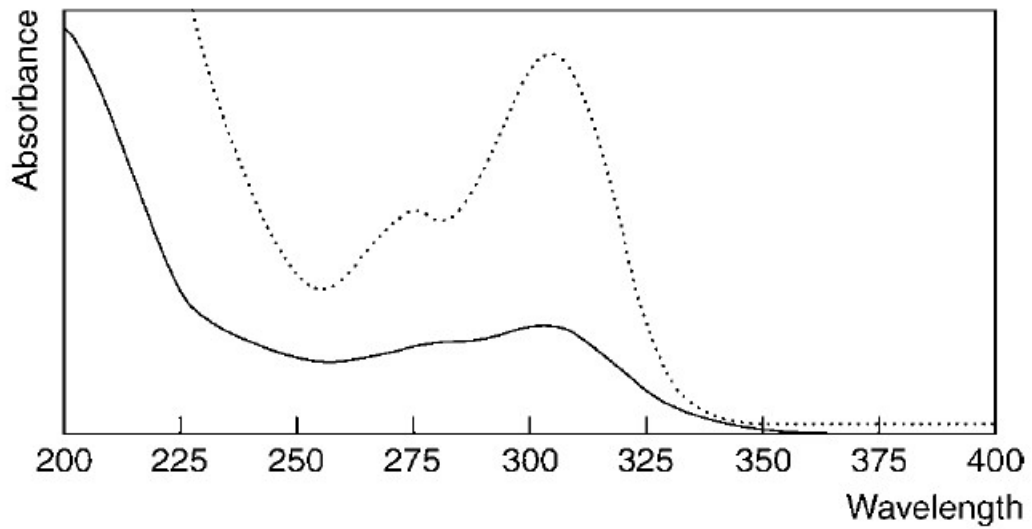

Fig S1C: UV spectrum of omeprazole in aqueous acidic (0.2 M/L sulfuric acid) at  $\lambda$  max = 277 nm and 303 nm.

- **Environmental impact evaluation**
- **The carbon footprint in kg CO<sub>2</sub> eq =**

Instrument Power (KW). Analysis time (h). Emission factor for electricity ( kg CO<sub>2</sub>/kWh)

The power consumption taken as reference for HPLC is equal 200 W

The reference constant value emission factor equal to 0.247 kg CO<sub>2</sub>/kWh

The analysis time = 8 minutes = 0.13 h

= 0.200 (KW) X 0.13 ( h)X 0.247 = 0.00659 Kg CO<sub>2</sub> equivalent
